# Supplementary material for: Mechanical and Plasma Electrolytic Polishing of Dental Alloys
Source: MDPI journal article supplement (doi:10.3390/ma16186222), 2023-09-15
Supplement: s1 [file s1]

## Article

# Mechanical and Plasma Electrolytic Polishing of Dental Alloys

Katharina Witzke <sup>1,\*</sup>, Renko Kensbock <sup>1</sup>, Caroline Ulrike Willsch <sup>1</sup>, Katja Fricke <sup>2</sup>, Sander Bekeschus <sup>2,3,†</sup> and Hans-Robert Metelmann <sup>1,†</sup>

<sup>1</sup> Department of Oral, Maxillofacial, and Plastic Surgery, Greifswald University Medical Center, Sauerbruchstr., 17475 Greifswald, Germany; renko.kensbock@med.uni-greifswald.de (R.K.); caroline.willsch@aol.de (C.U.W.); metelman@uni-greifswald.de (H.-R.M.)

<sup>2</sup> Leibniz Institute for Plasma Science and Technology (INP), Felix Hausdorff-Str. 2, 17489 Greifswald, Germany; fricke@nebula-biocides.de (K.F.); sander.bekeschus@gmail.com (S.B.)

<sup>3</sup> Clinic and Polyclinic for Dermatology and Venerology, Rostock University Medical Center, Strepelstr. 13, 18057 Rostock, Germany

\* Correspondence: katharina.witzke@med.uni-greifswald.de

† These authors contributed equally to this work.

**Table S1.** Heraenium® Sun sample roughness  $R_a$  and associated standard deviation  $\Delta R_a$  obtained from AFM analysis (line length of 100  $\mu\text{m}$ ) after conventional mechanical polishing, plasma electrolytic polishing, and unpolished sandblasted state.

| sample      | conventional<br>mechanical polishing |                   | plasma<br>electrolytic polishing |                   | sandblasted<br>(unpolished) |                   |
|-------------|--------------------------------------|-------------------|----------------------------------|-------------------|-----------------------------|-------------------|
| Heraenium®  | $R_a$ (nm)                           | $\Delta R_a$ (nm) | $R_a$ (nm)                       | $\Delta R_a$ (nm) | $R_a$ (nm)                  | $\Delta R_a$ (nm) |
| 1           | 108.41                               | 12.96             | 170.38                           | 51.28             | 1144.86                     | 355.40            |
| 2           | 109.07                               | 5.31              | 207.74                           | 58.14             | 904.03                      | 236.00            |
| 3           | 105.43                               | 11.75             | 175.62                           | 39.49             | 1617.70                     | 628.37            |
| 4           | 76.15                                | 25.24             | 159.84                           | 60.97             | 1031.52                     | 327.77            |
| 5           | 158.65                               | 8.33              | 311.54                           | 100.24            | 718.83                      | 167.15            |
| 6           | 129.43                               | 13.68             | 238.01                           | 21.59             | 607.33                      | 294.26            |
| 7           | 238.00                               | 57.76             | 196.00                           | 81.90             | 902.29                      | 233.89            |
| 8           | 154.89                               | 5.49              | 721.87                           | 288.43            | 575.20                      | 113.49            |
| 9           | 120.70                               | 18.01             | 223.22                           | 92.48             | 1223.10                     | 298.28            |
| 10          | 140.71                               | 70.33             | 478.80                           | 149.90            | 1187.77                     | 221.01            |
| <b>mean</b> | <b>134.14</b>                        | <b>22.89</b>      | <b>288.30</b>                    | <b>94.44</b>      | <b>991.26</b>               | <b>287.56</b>     |

**Table S2.** Wironit® sample roughness  $R_a$  and associated standard deviation  $\Delta R_a$  obtained from AFM analysis (line length of 100  $\mu\text{m}$ ) after conventional mechanical polishing, plasma electrolytic polishing, and unpolished sandblasted state.

| sample   | conventional<br>mechanical polishing |                   | plasma<br>electrolytic polishing |                   | sandblasted<br>(unpolished) |                   |
|----------|--------------------------------------|-------------------|----------------------------------|-------------------|-----------------------------|-------------------|
| Wironit® | $R_a$ (nm)                           | $\Delta R_a$ (nm) | $R_a$ (nm)                       | $\Delta R_a$ (nm) | $R_a$ (nm)                  | $\Delta R_a$ (nm) |
| 1        | 186.64                               | 18.08             | 242.12                           | 65.00             | 994.05                      | 139.25            |
| 2        | 140.24                               | 18.58             | 242.47                           | 49.33             | 2397.50                     | 917.81            |
| 3        | 223.06                               | 9.08              | 248.45                           | 26.95             | 836.43                      | 284.73            |
| 4        | 140.16                               | 11.87             | 233.52                           | 47.91             | 1316.90                     | 165.60            |
| 5        | 132.40                               | 8.70              | 186.99                           | 35.03             | 1161.86                     | 341.81            |
| 6        | 53.02                                | 7.15              | 492.69                           | 102.29            | 1036.10                     | 649.67            |

---

|             |               |              |               |              |                |               |
|-------------|---------------|--------------|---------------|--------------|----------------|---------------|
| 7           | 124.06        | 21.22        | 245.89        | 36.25        | 976.19         | 223.32        |
| 8           | 40.93         | 5.96         | 270.78        | 61.55        | 1390.50        | 228.28        |
| 9           | 35.75         | 3.22         | 235.31        | 42.94        | 1031.51        | 235.24        |
| 10          | 67.73         | 3.33         | 214.97        | 20.72        | 732.10         | 122.43        |
| <b>Mean</b> | <b>114.40</b> | <b>10.72</b> | <b>261.32</b> | <b>48.80</b> | <b>1187.31</b> | <b>330.81</b> |

---

**Table S3.** Sample weight loss due to plasma electrolytic polishing.

| sample |     | time<br>(min) | weight before<br>plasma polishing<br>(g) | weight after<br>plasma polishing<br>(g) | weight<br>difference<br>(g) | relative differ-<br>ence<br>(%) |
|--------|-----|---------------|------------------------------------------|-----------------------------------------|-----------------------------|---------------------------------|
| BMA    | 1a  | 5             | 2.644                                    | 2.586                                   | 0.058                       | 2.194                           |
| BMA    | 2a  | 10            | 6.600                                    | 6.339                                   | 0.261                       | 3.955                           |
| BMA    | 3a  | 20            | 6.168                                    | 5.685                                   | 0.483                       | 7.831                           |
| BMA    | 4a  | 30            | 3.615                                    | 3.148                                   | 0.467                       | 12.918                          |
| BMA    | 5a  | 5             | 5.844                                    | 5.732                                   | 0.112                       | 1.917                           |
| BMA    | 6a  | 5             | 4.917                                    | 4.816                                   | 0.101                       | 2.054                           |
| BMA    | 7a  | 5             | 2.509                                    | 2.443                                   | 0.066                       | 2.630                           |
| BMA    | 8a  | 5             | 1.786                                    | 1.733                                   | 0.053                       | 2.968                           |
| BMA    | 9a  | 5             | 2.173                                    | 2.122                                   | 0.051                       | 2.347                           |
| BMA    | 10a | 5             | 2.278                                    | 2.221                                   | 0.057                       | 2.502                           |
| PDA    | 1a  | 5             | 2.492                                    | 2.440                                   | 0.052                       | 2.087                           |
| PDA    | 2a  | 10            | 1.407                                    | 1.318                                   | 0.089                       | 6.326                           |
| PDA    | 3a  | 20            | 1.975                                    | 1.754                                   | 0.221                       | 11.190                          |
| PDA    | 4a  | 30            | 1.913                                    | 1.562                                   | 0.351                       | 18.348                          |
| PDA    | 5a  | 5             | 1.422                                    | 1.378                                   | 0.044                       | 3.094                           |
| PDA    | 6a  | 5             | 1.486                                    | 1.438                                   | 0.048                       | 3.230                           |
| PDA    | 7a  | 5             | 1.583                                    | 1.534                                   | 0.049                       | 3.095                           |
| PDA    | 8a  | 5             | 1.921                                    | 1.862                                   | 0.059                       | 3.071                           |
| PDA    | 9a  | 5             | 1.305                                    | 1.263                                   | 0.042                       | 3.218                           |
| PDA    | 10a | 5             | 1.298                                    | 1.256                                   | 0.042                       | 3.236                           |

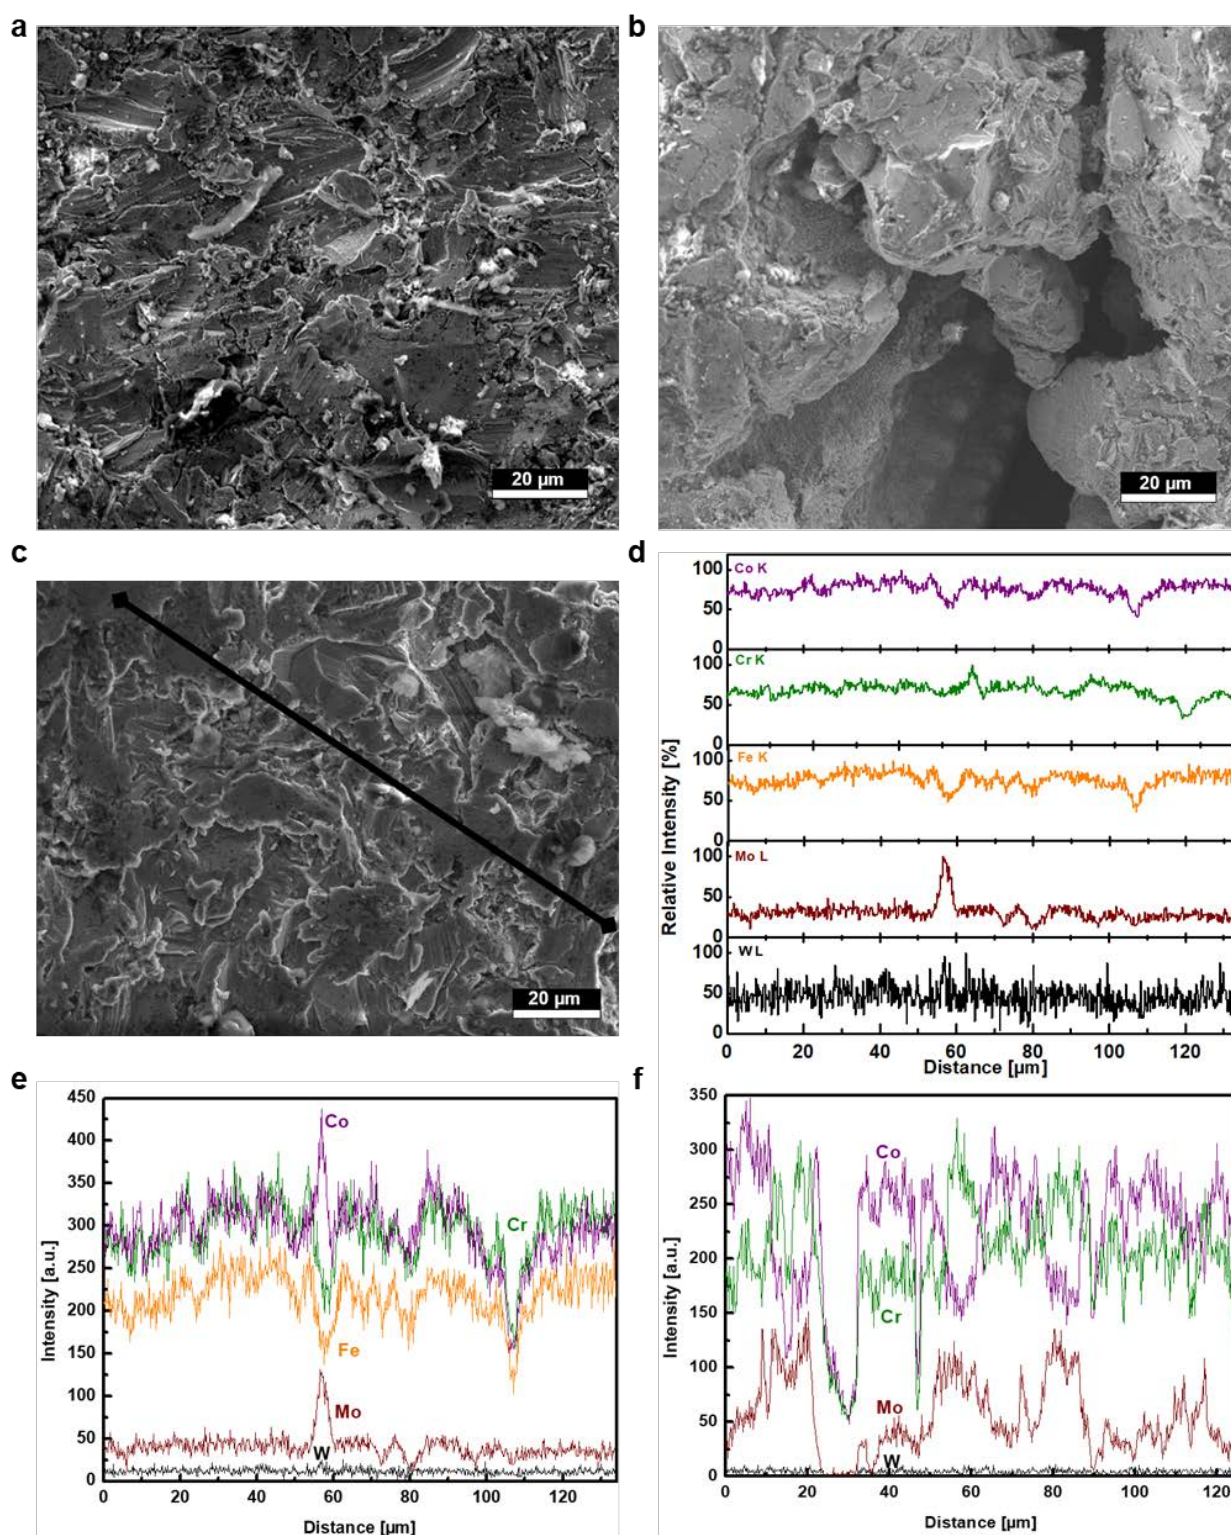

**Figure S1. Sandblasted specimens in the unpolished reference state.** (a) An image of an unpolished Heraenium® Sun specimen is shown (1000-fold magnification; SEM). (b) A ravine is found on an unpolished Heraenium® Sun specimen (1000-fold magnification; SEM). (c) A sandblasted Heraenium® Sun (BMA) specimen is analyzed with EDX along a defined line. (d–e) Co, Cr, Mo and W were selected and are shown in corresponding concentration curves (1000-fold magnification; SEM and EDX). (f) Sandblasted Wironit® (PDA) specimen analyzed with EDX along a defined line. Mo, Cr, Co and W were selected and are shown in corresponding concentration curves (1000-fold magnification; EDX). Absolute intensities are shown. Relative intensities are found in Figure 3b–c with the original SEM image.
